# Supplementary material for: Anti-HIV Activities and Mechanism of 12-O-Tricosanoylphorbol-20-acetate, a Novel Phorbol Ester from Ostodes katharinae
Source: MDPI journal article supplement (doi:10.3390/molecules22091498), 2017-09-08
Supplement: s1 [file s1]

## Single Mass Analysis

Tolerance = 40.0 mDa / DBE: min = -10.0, max = 120.0

Selected filters: None

Monoisotopic Mass, Odd and Even Electron Ions

30 formula(e) evaluated with 3 results within limits (up to 51 closest results for each mass)

Elements Used:

C: 0-200 H: 0-400 O: 7-9

hop-8

12:25:38 20-Aug-2012

Voltage EI+

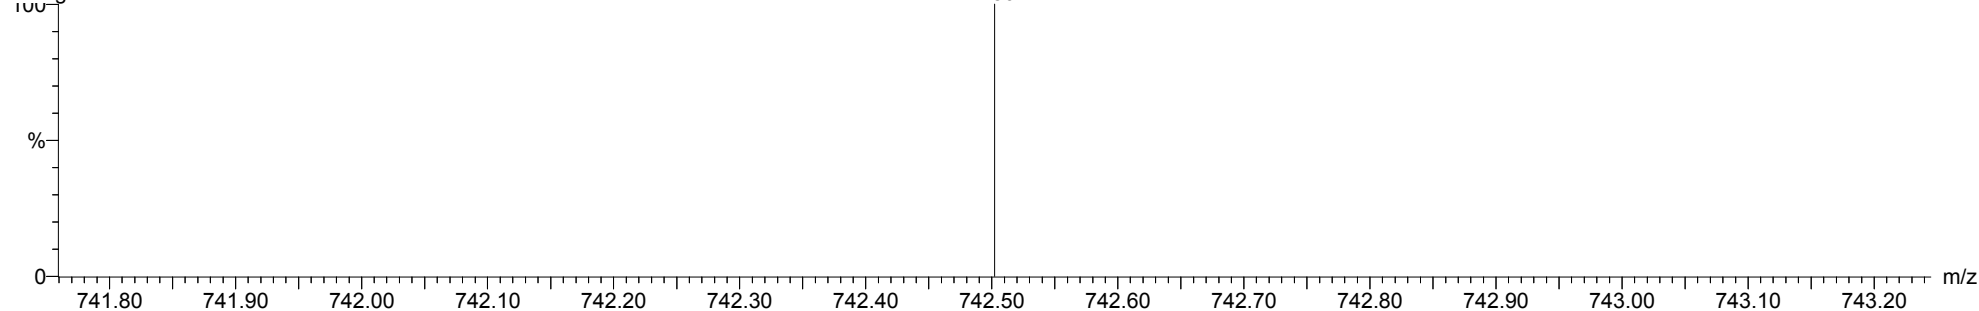

Minimum: -10.0  
Maximum: 40.0 10.0 120.0

| Mass     | Calc. Mass | mDa   | PPM   | DBE  | i-FIT     | Formula |     |    |
|----------|------------|-------|-------|------|-----------|---------|-----|----|
| 742.5022 | 742.5020   | 0.2   | 0.3   | 10.0 | 5546025.5 | C44     | H70 | O9 |
|          | 742.4809   | 21.3  | 28.7  | 15.0 | 5546026.0 | C47     | H66 | O7 |
|          | 742.5384   | -36.2 | -48.8 | 9.0  | 5546025.5 | C45     | H74 | O8 |
