# Supplementary material for: Anti-HIV Activities and Mechanism of 12-O-Tricosanoylphorbol-20-acetate, a Novel Phorbol Ester from Ostodes katharinae
Source: MDPI journal article supplement (doi:10.3390/molecules22091498), 2017-09-08
Supplement: s1 [file s1]

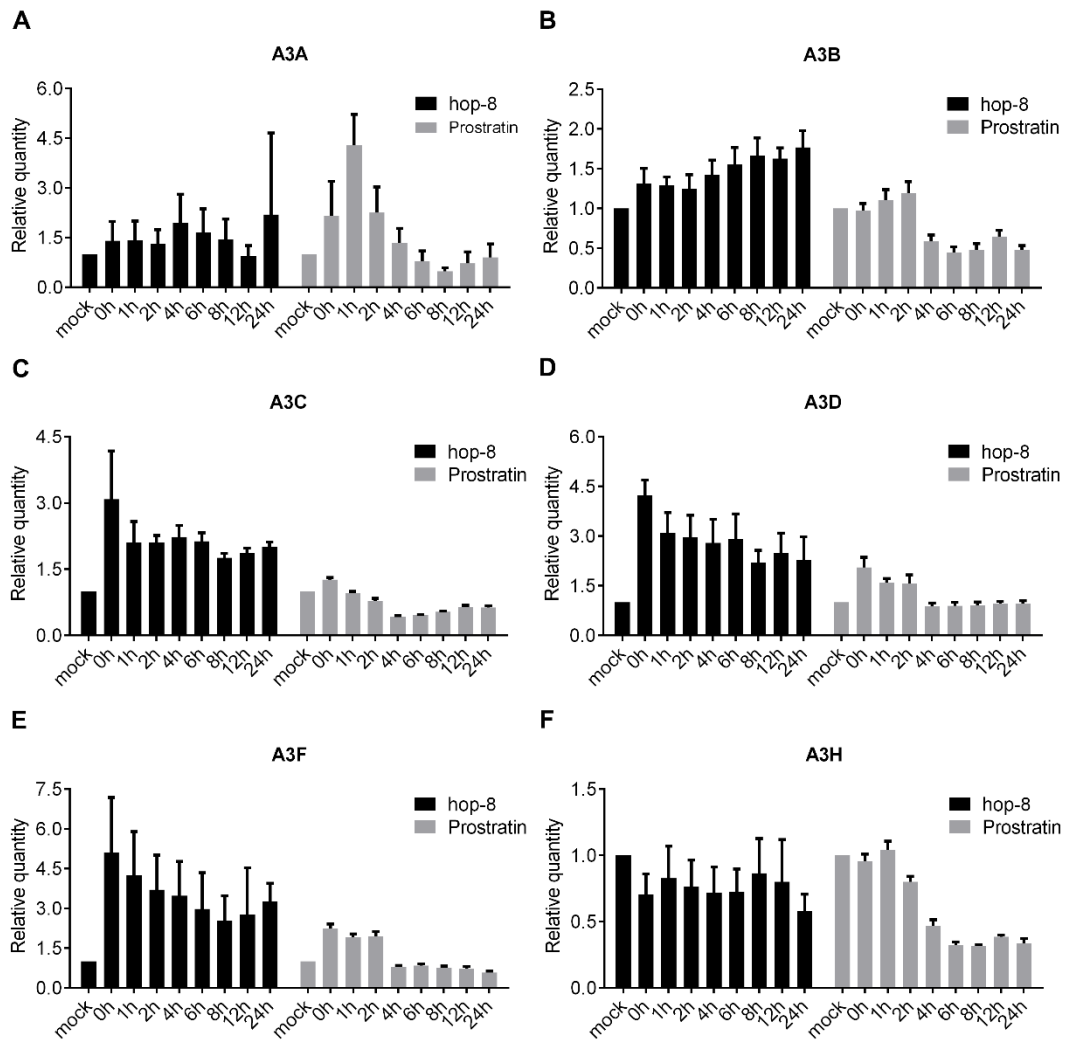

**Figure S1.** The influence of hop-8 and prostratin on other APOBEC3s. The mRNA levels of A3A (A), A3B (B), A3C (C), A3D (D), A3F (E) and A3H (F) in PBMCs when treated with hop-8 (2 $\mu$ M) (black) or prostratin (2 $\mu$ M) (gray). Each data point represents the mean relative quantity (relative to the mock)  $\pm$  standard deviation (bars)  $\pm$  standard deviation (bars), n=2. Data were analyzed with GraphPad Prism 6.0.

**Table S1.** Inhibitive ability of hop-8 against the key enzymes of HIV and gp41.

| Target                | IC <sub>50</sub> (μM) <sup>1</sup> |
|-----------------------|------------------------------------|
| Reverse transcriptase | >67.5                              |
| Protease              | >67.5                              |
| Integrase             | >67.5                              |
| gp41                  | >67.5                              |

<sup>1</sup> IC<sub>50</sub>, concentration at 50% inhibition, n=2.

**Table S2.** Information of the primers used in this study.

| Gene                  | GenBank accession No. | Sequence (5'-3') <sup>1</sup>                                               |
|-----------------------|-----------------------|-----------------------------------------------------------------------------|
| GAPDH <sup>2</sup>    | M33197.1              | 5'- GCTTCGCTCTCTGCTCCTCCTGTT-3' (S)<br>5'- ACGACCAAATCCGTTGACTCCGACC-3' (A) |
| APOBEC3A              | NM_145699.3           | 5'- CGGGCCCAGACACTTGATGGAT-3' (A)<br>5'- CATTGTCCAGGCGCTCCACTTC-3' (S)      |
| APOBEC3B              | NM_004900.4           | 5'- ATGGTCGGAGCTACACTTGGCT-3' (A)<br>5'- GGCTTGAAATACACCTGGCCTCG-3' (S)     |
| APOBEC3C              | NM_014508.2           | 5'- CTGCTCAACTGCAAGGACGCTG-3' (A)<br>5'- ACATTGCCTTCATCGGGTTTCTGA-3' (S)    |
| APOBEC3D              | NM_152426.3           | 5'- GGGCCGCTCAAATCTCCTTTGG-3' (A)<br>5'- CCGGAAATACACCTCCTGCCTG-3' (S)      |
| APOBEC3F              | NM_145298.5           | 5'- TTCGAGGCCAGGTGTATTCCCAG-3' (A)<br>5'- ATGGTCAGGGTGACATTGGGGT-3' (S)     |
| APOBEC3G <sup>2</sup> | JF262036.1            | 5'- TTGTAGATGAGTGCTCCGTGG-3' (A)<br>5'- CACGTGAGCCTGTGCATCTTC-3' (S)        |
| APOBEC3H              | NM_001166003.2        | 5'- TGGGCTTCCCAGAGTTTGCTGA-3' (A)<br>5'- CCGTCGCTTTATGGCTCGACTG-3' (S)      |

<sup>1</sup> S, sense; A, antisense.

<sup>2</sup>The primers of GAPDH and APOBEC3G were cited from the reference [10].
