# Supplementary figures and images for: Anti-HIV Activities and Mechanism of 12-O-Tricosanoylphorbol-20-acetate, a Novel Phorbol Ester from Ostodes katharinae
Source: MDPI journal article supplement (doi:10.3390/molecules22091498), 2017-09-08

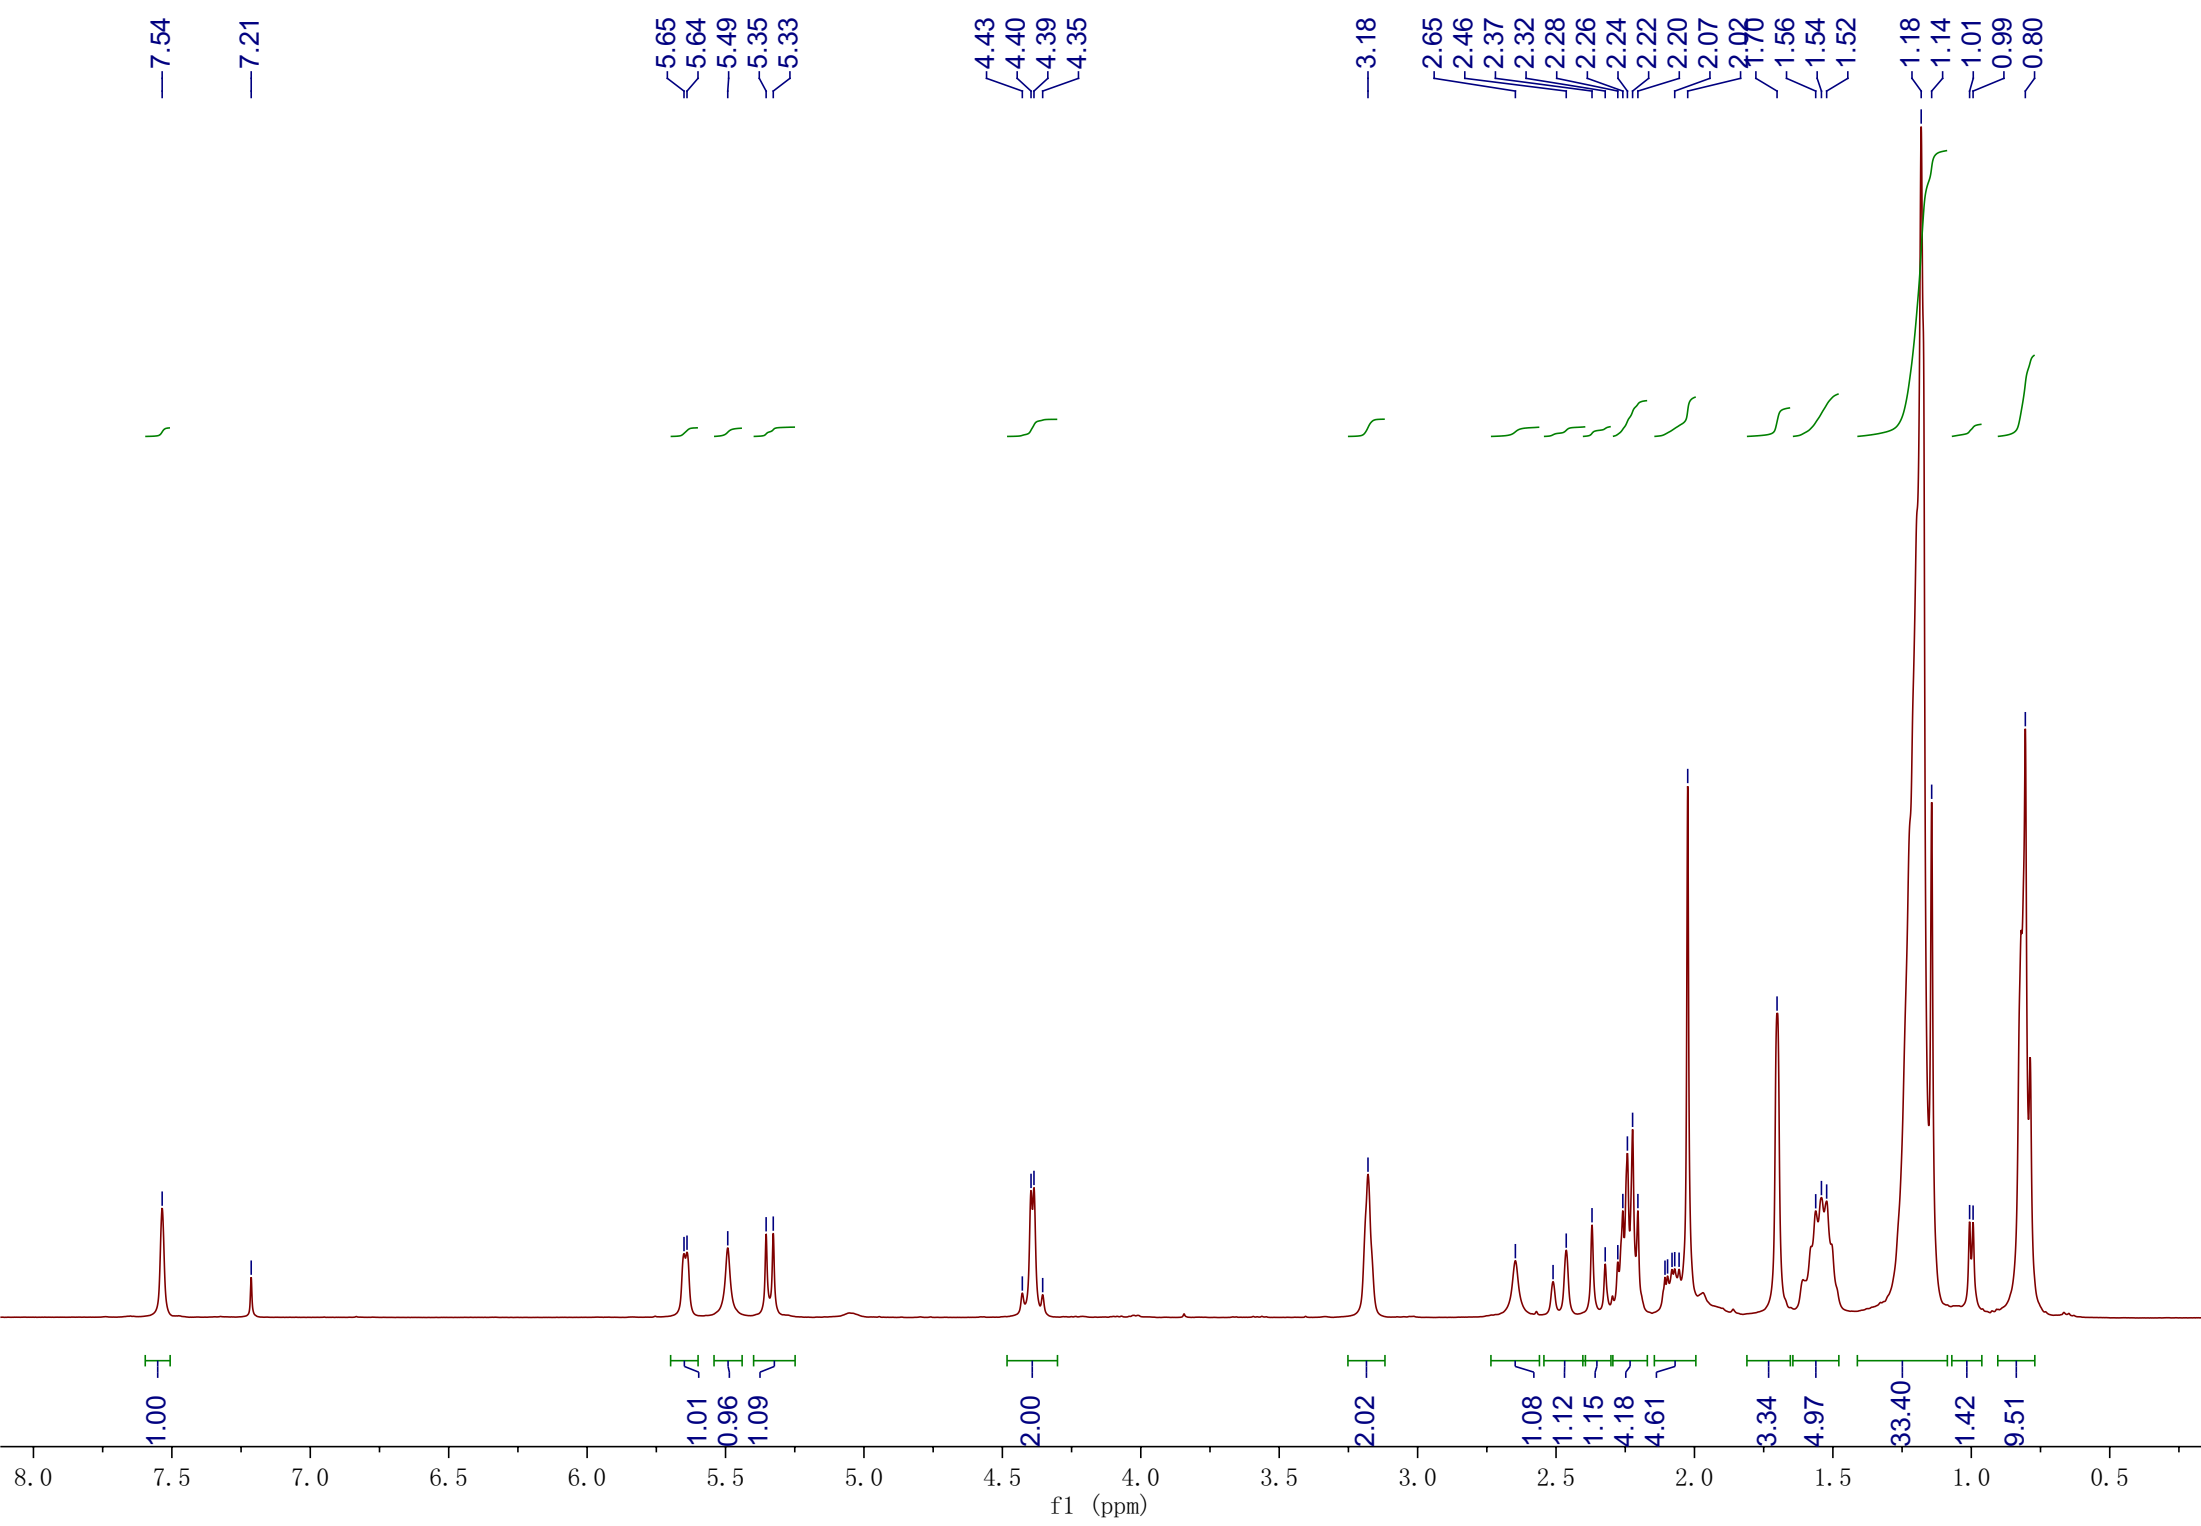

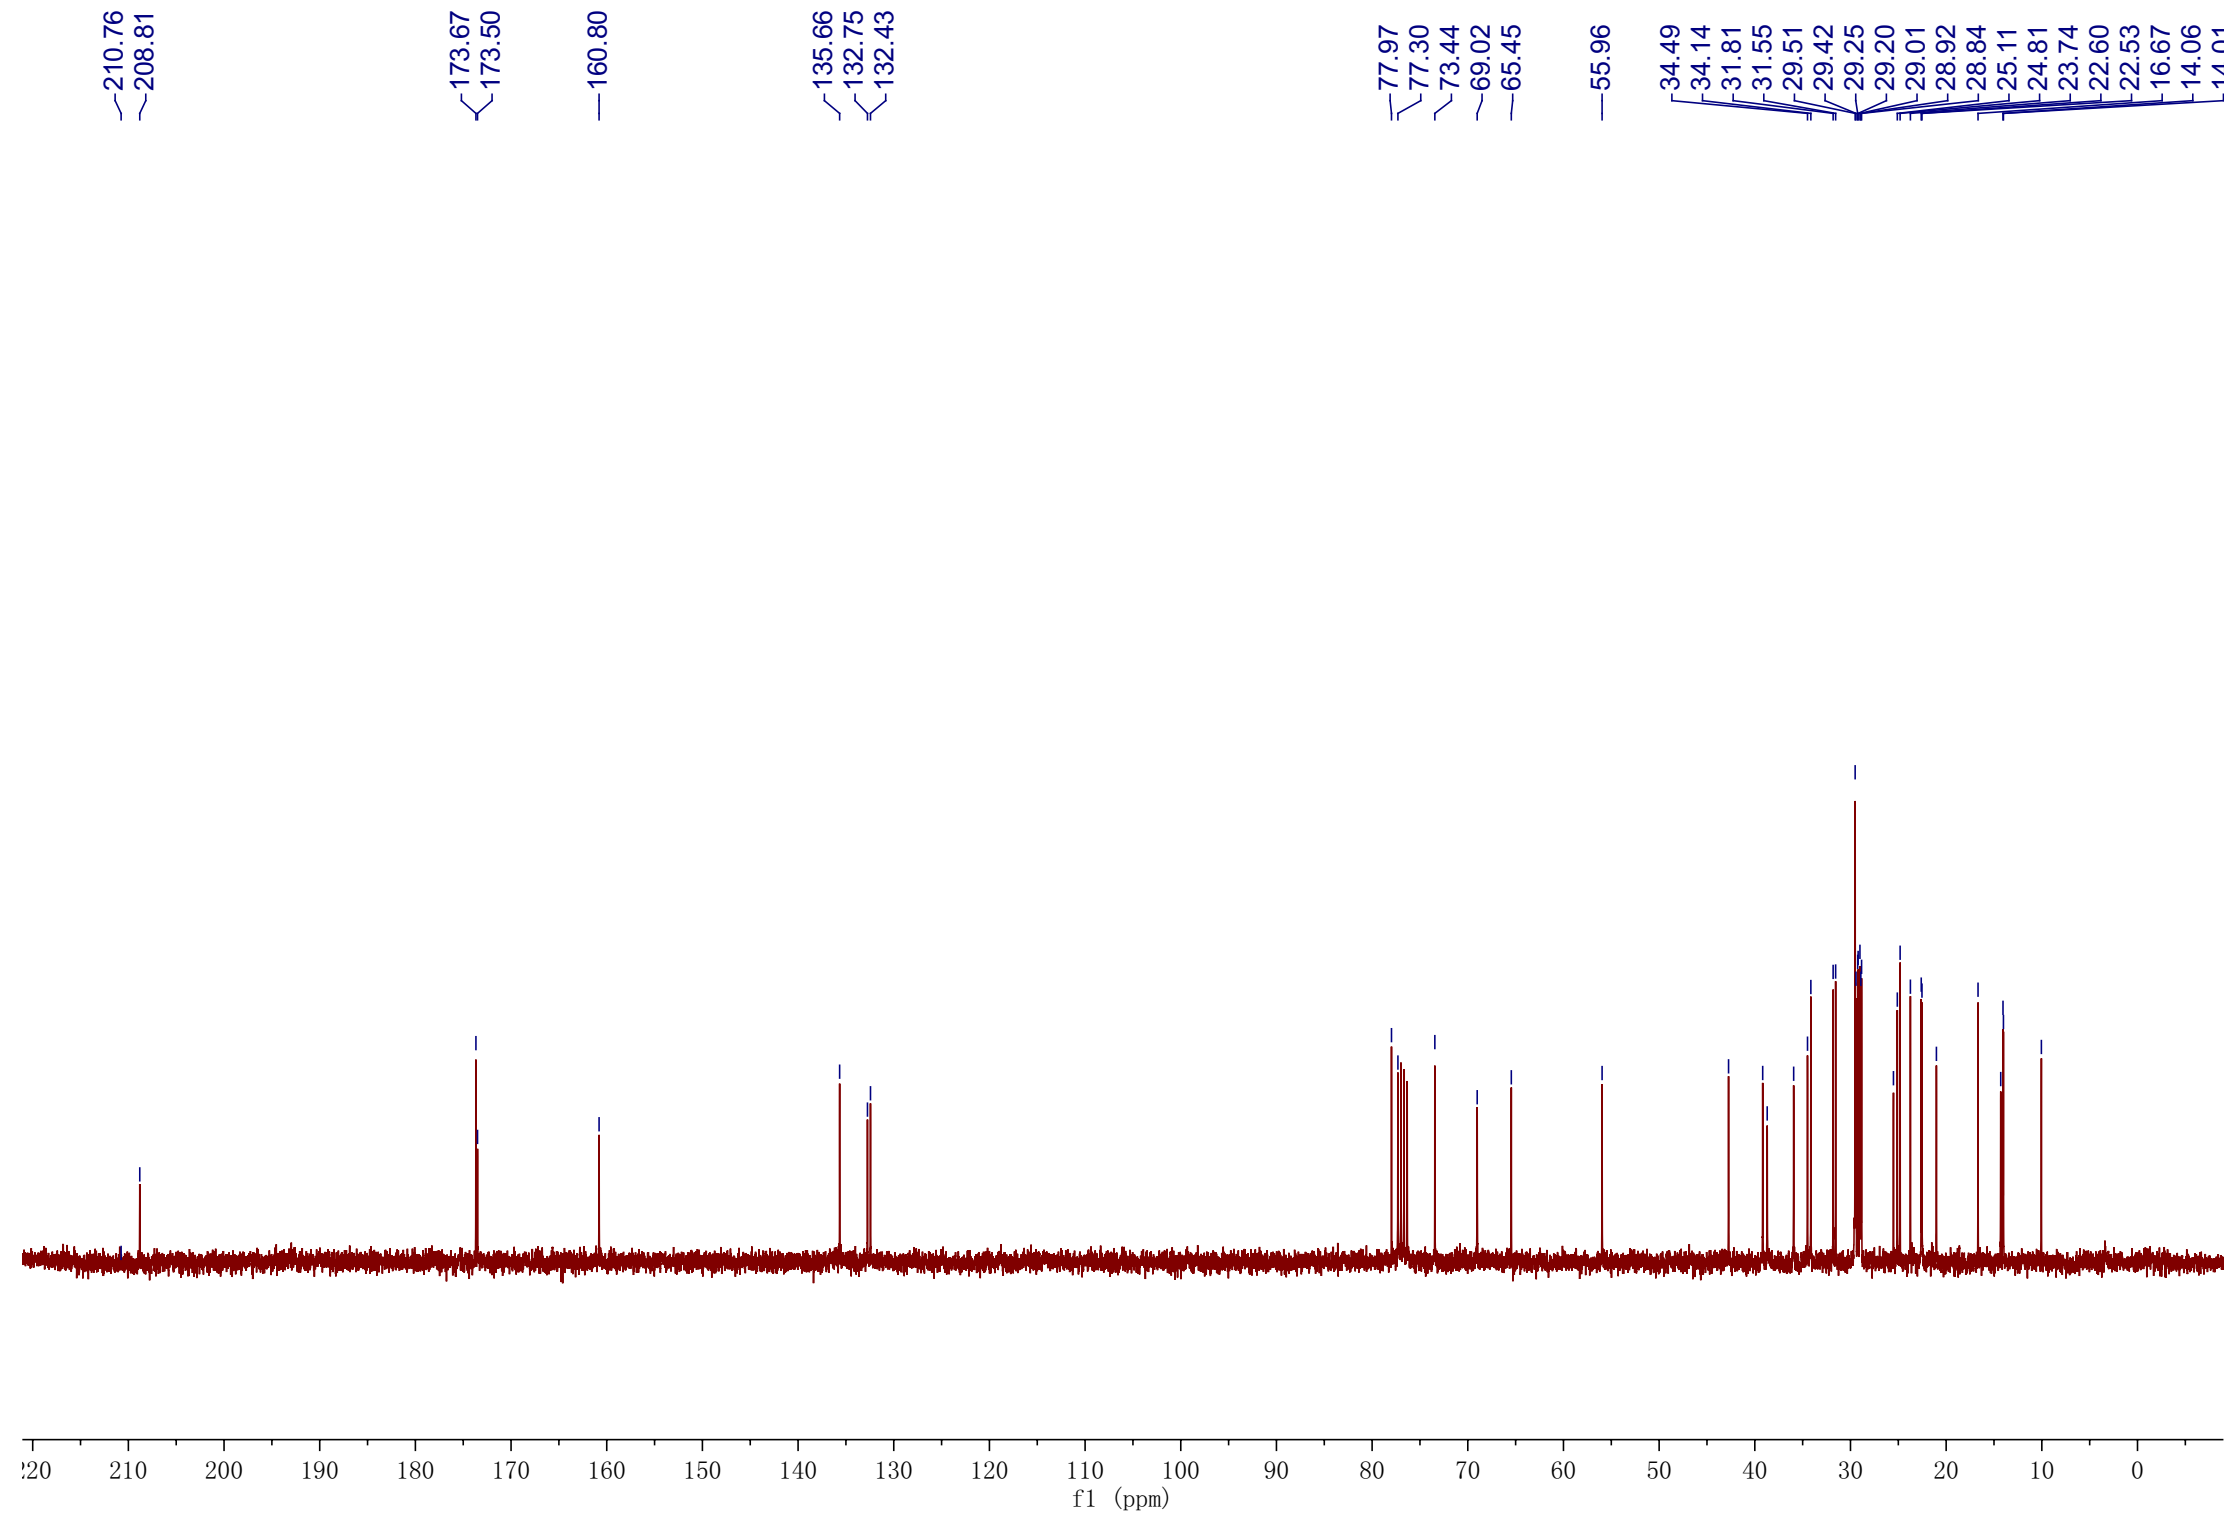

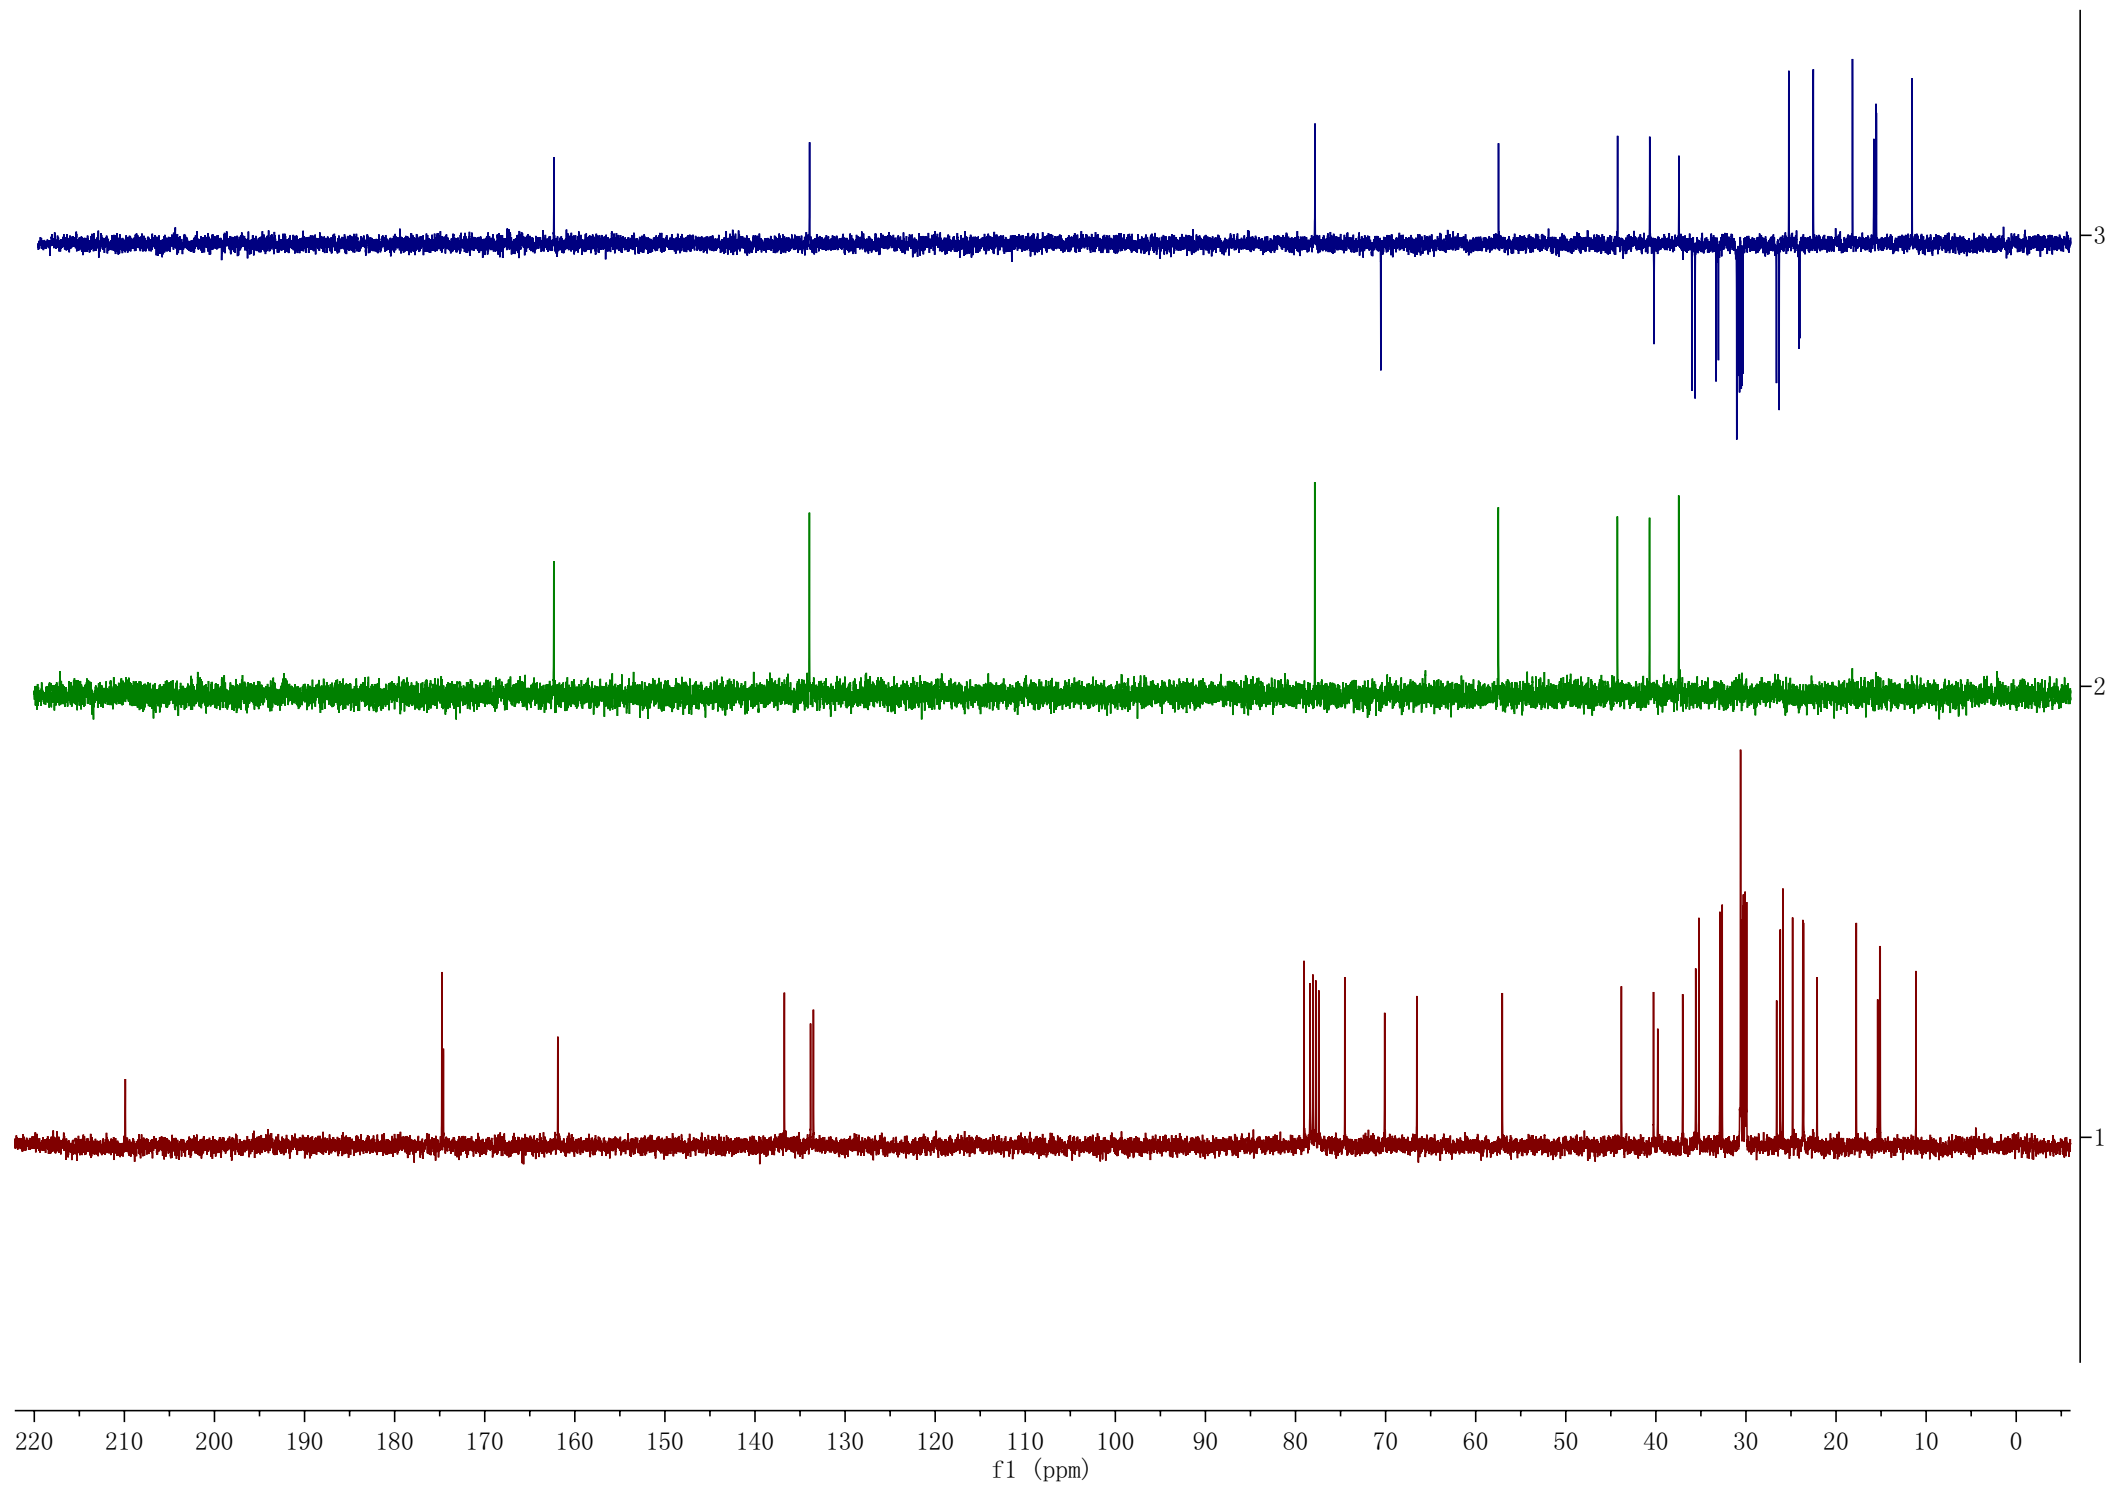

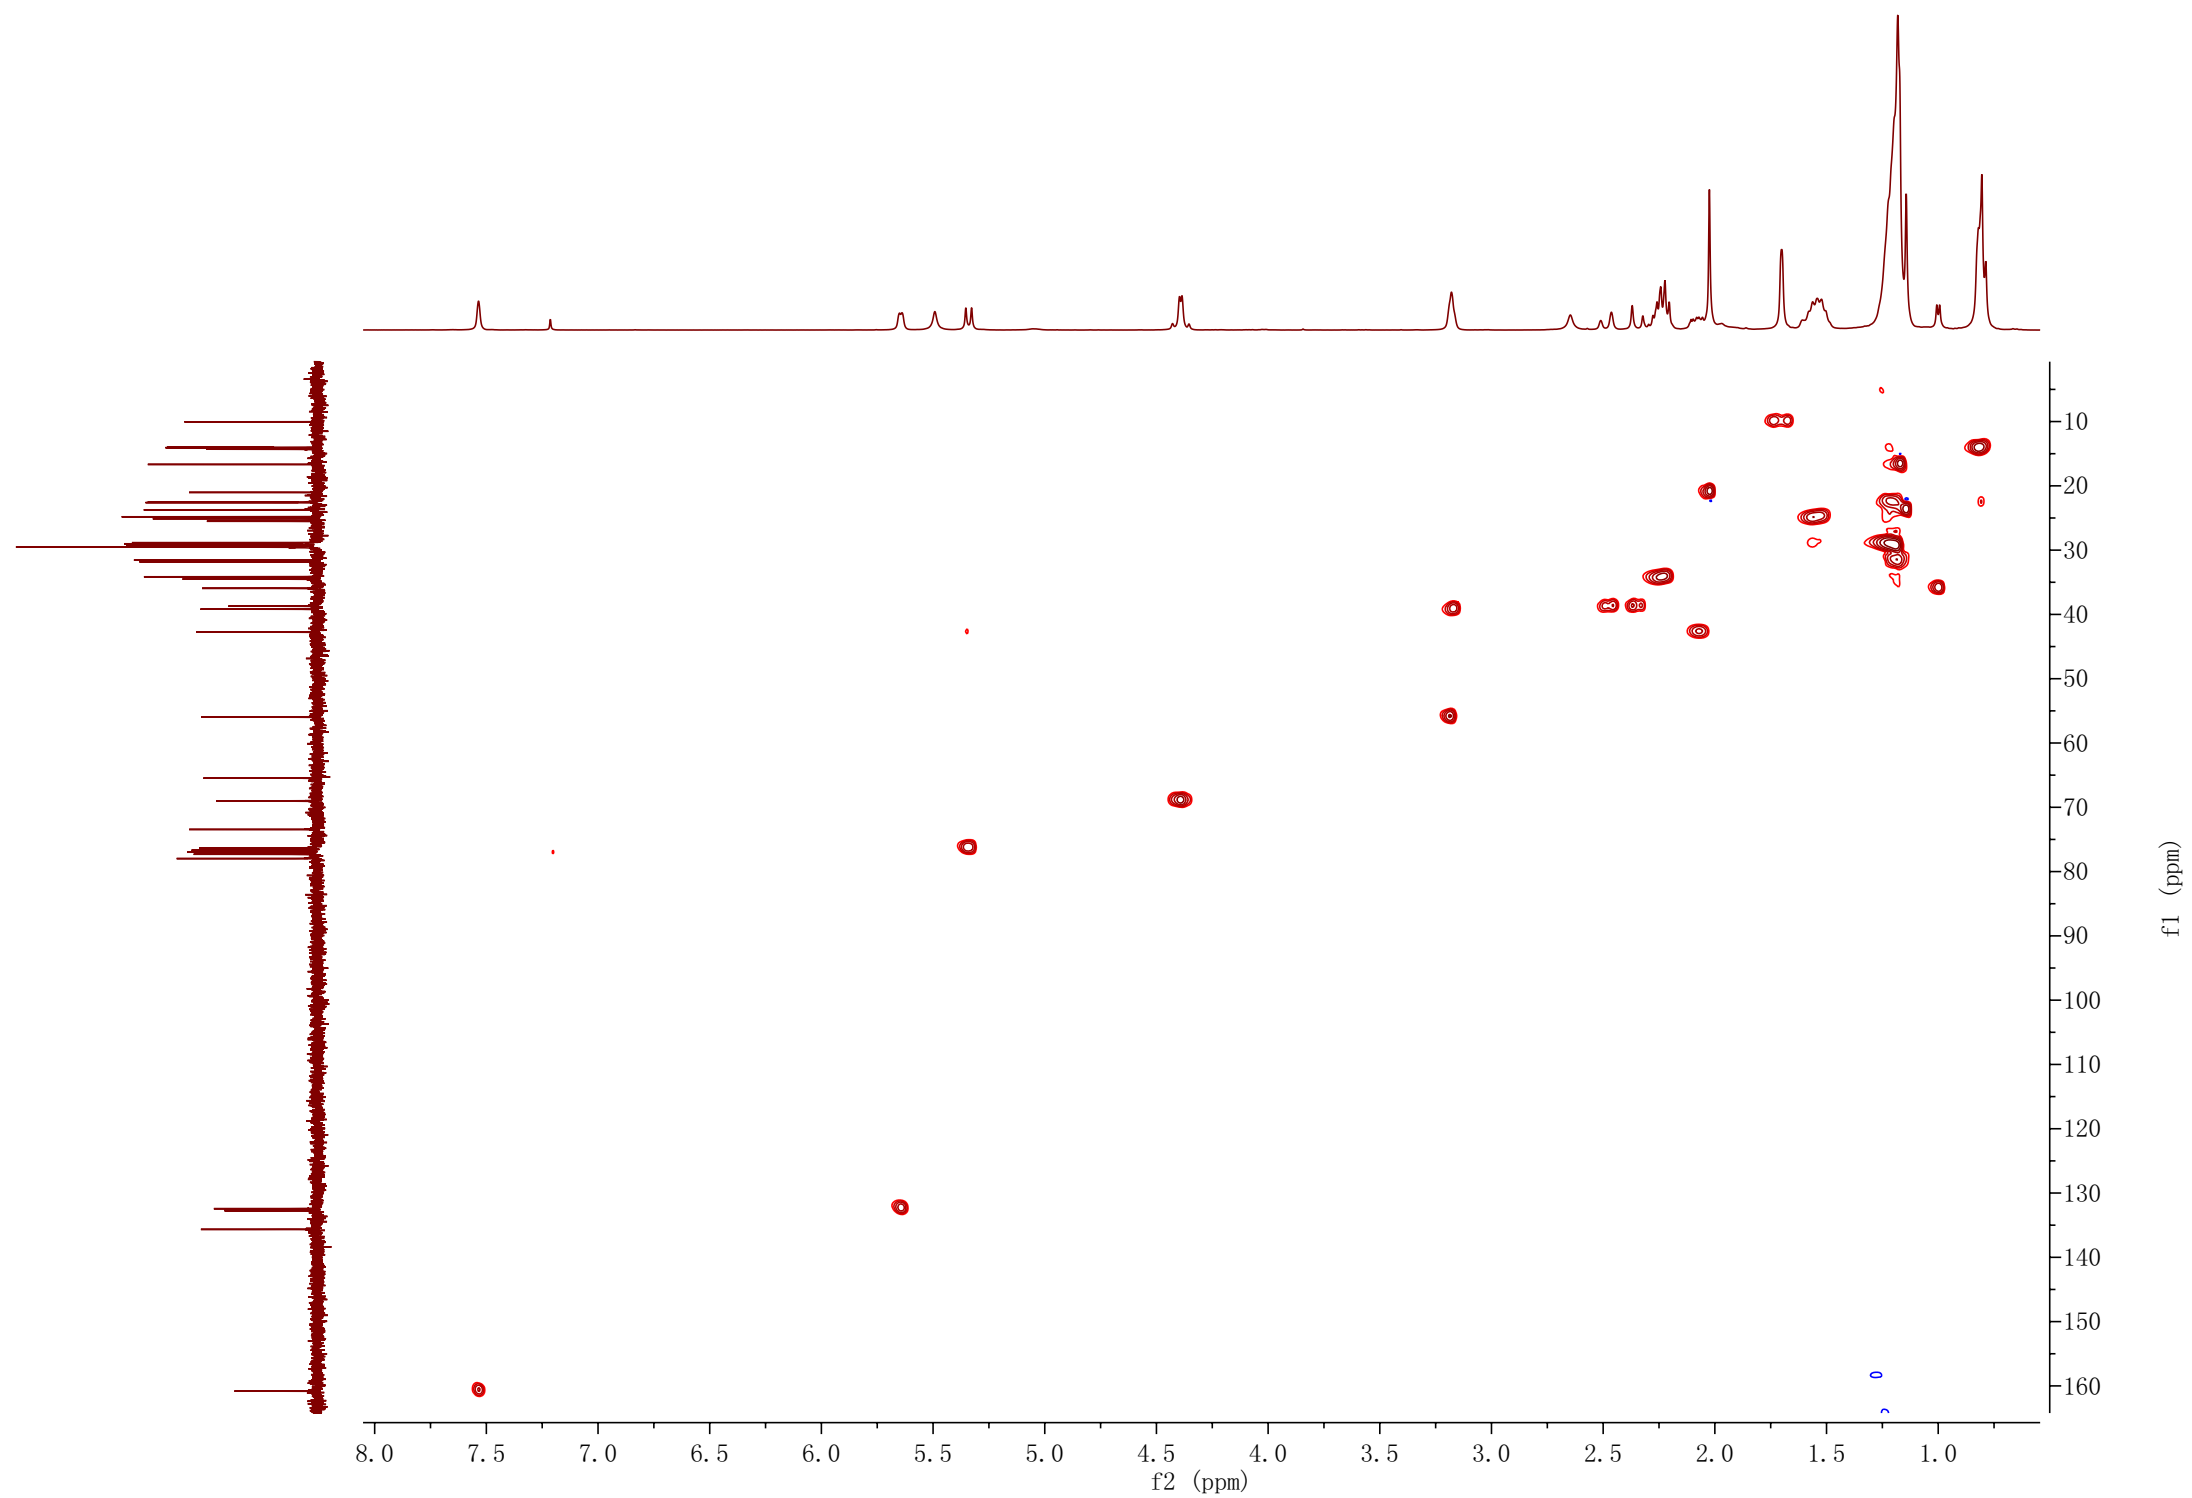

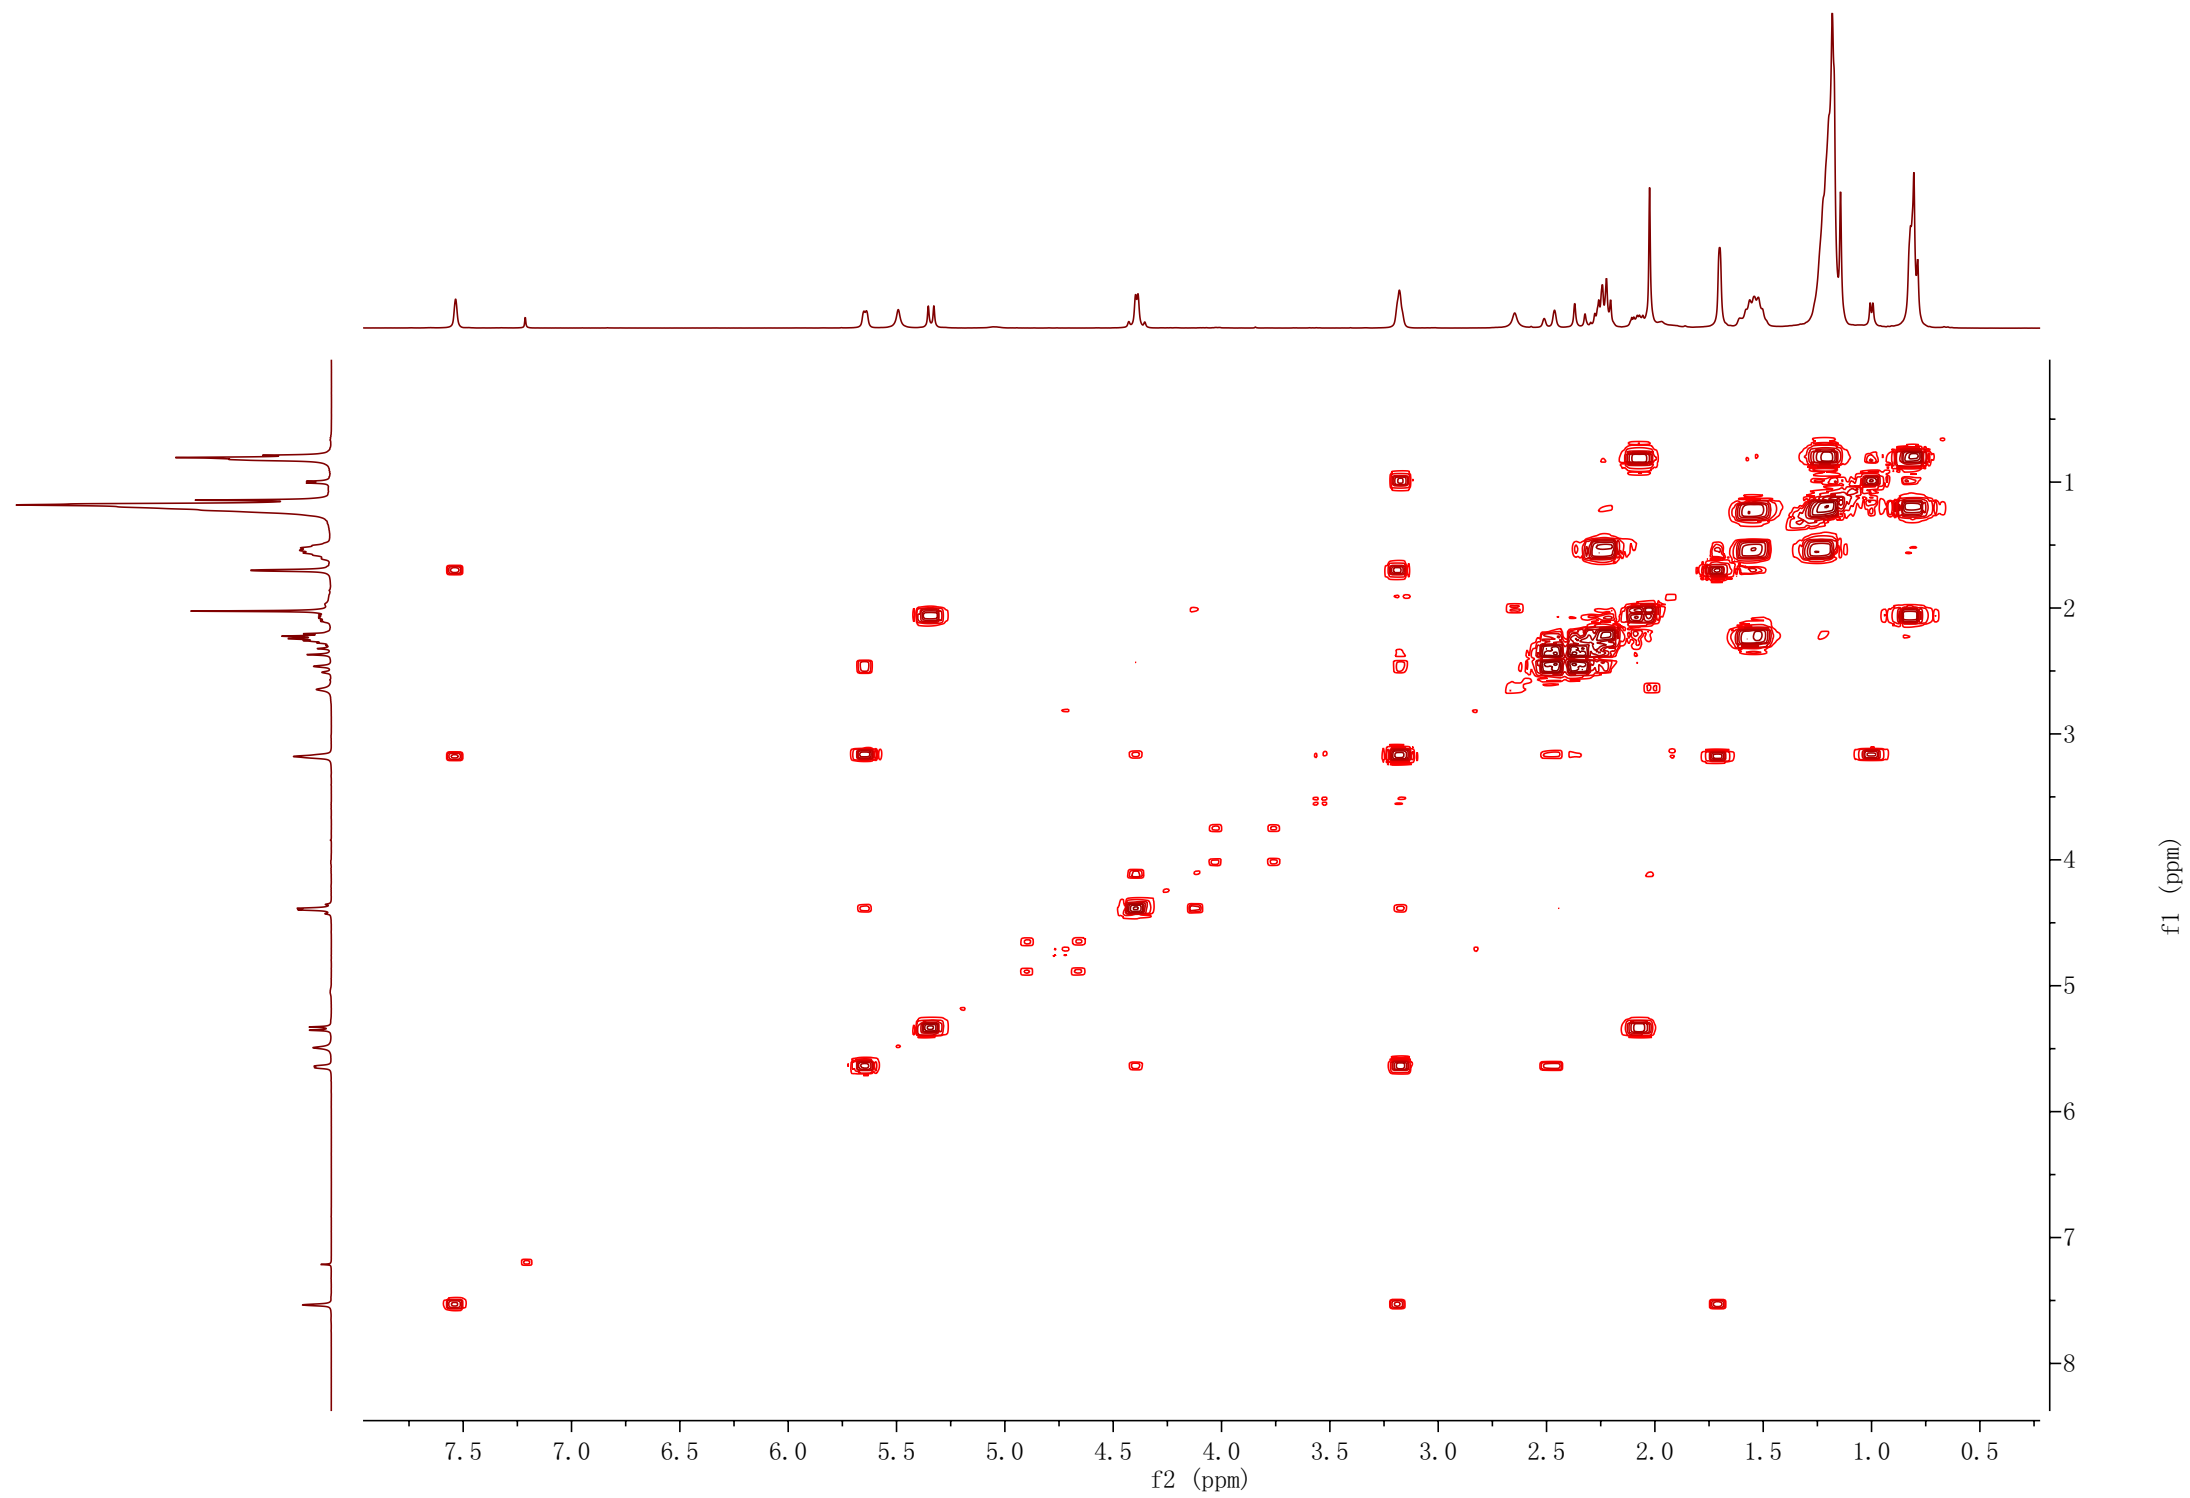

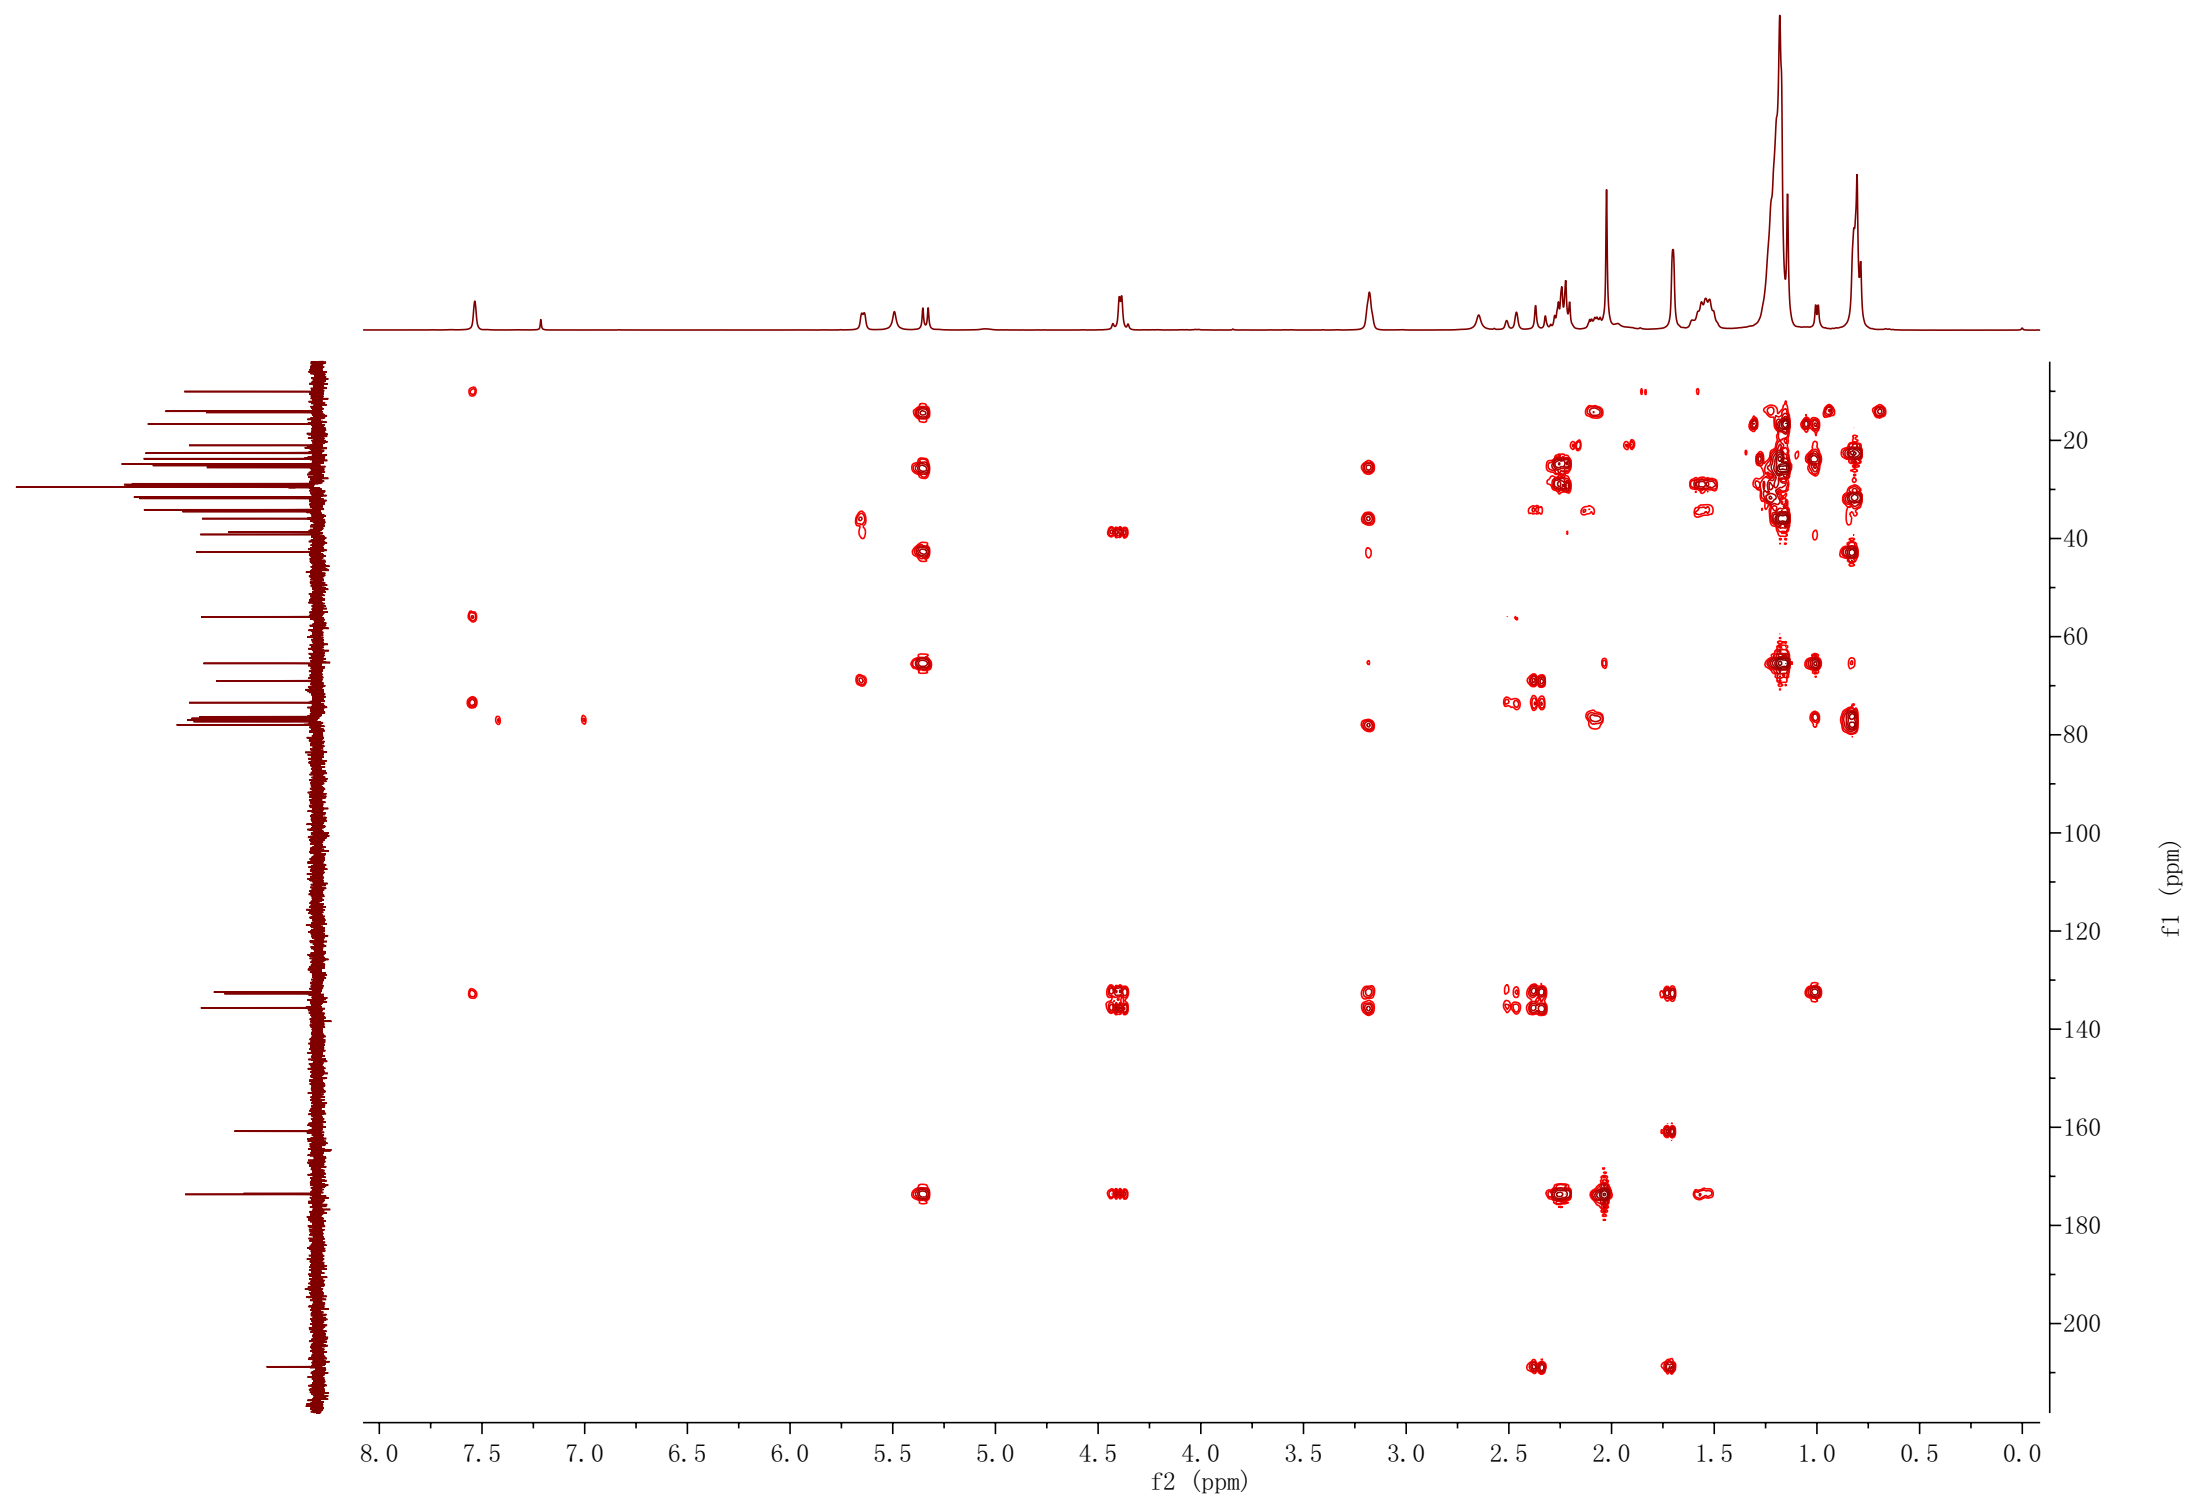

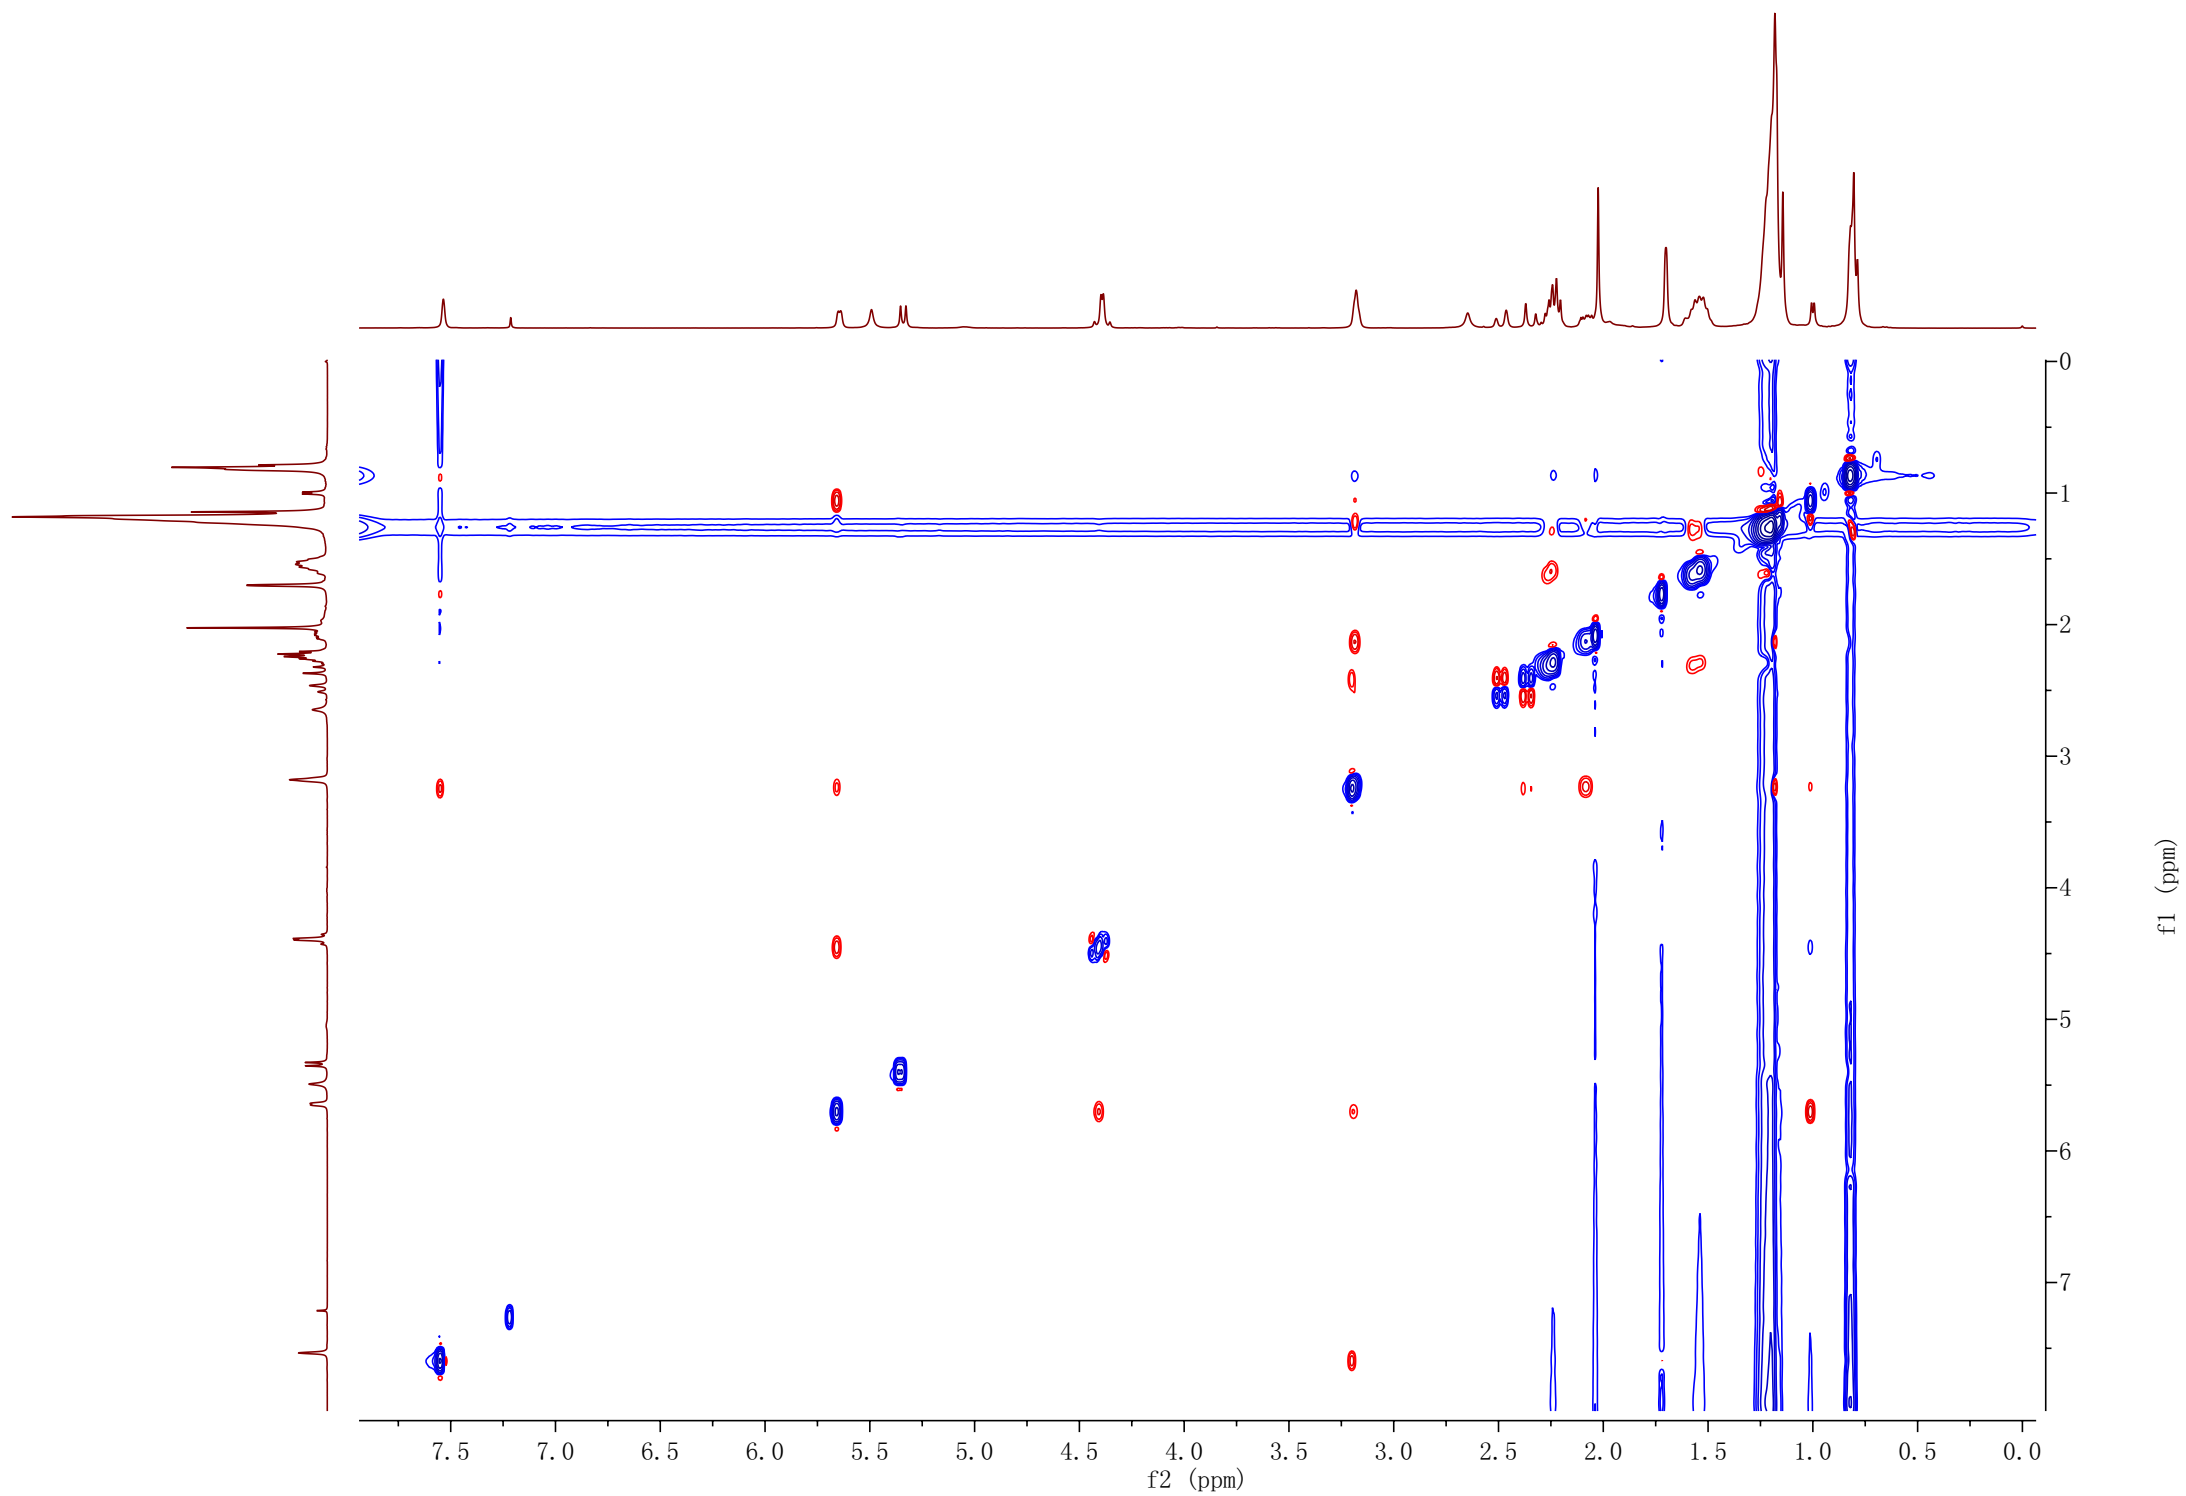

Supplement: s1 [file s1]

hop-8

10:40:46 21-Aug-2017

M170821E-09 27 (1.986) Cn (Top,2, Ht); Cm (21:27-2:14)

KIB

Autospec Premier

P776

Magnet EI+

2.52e3

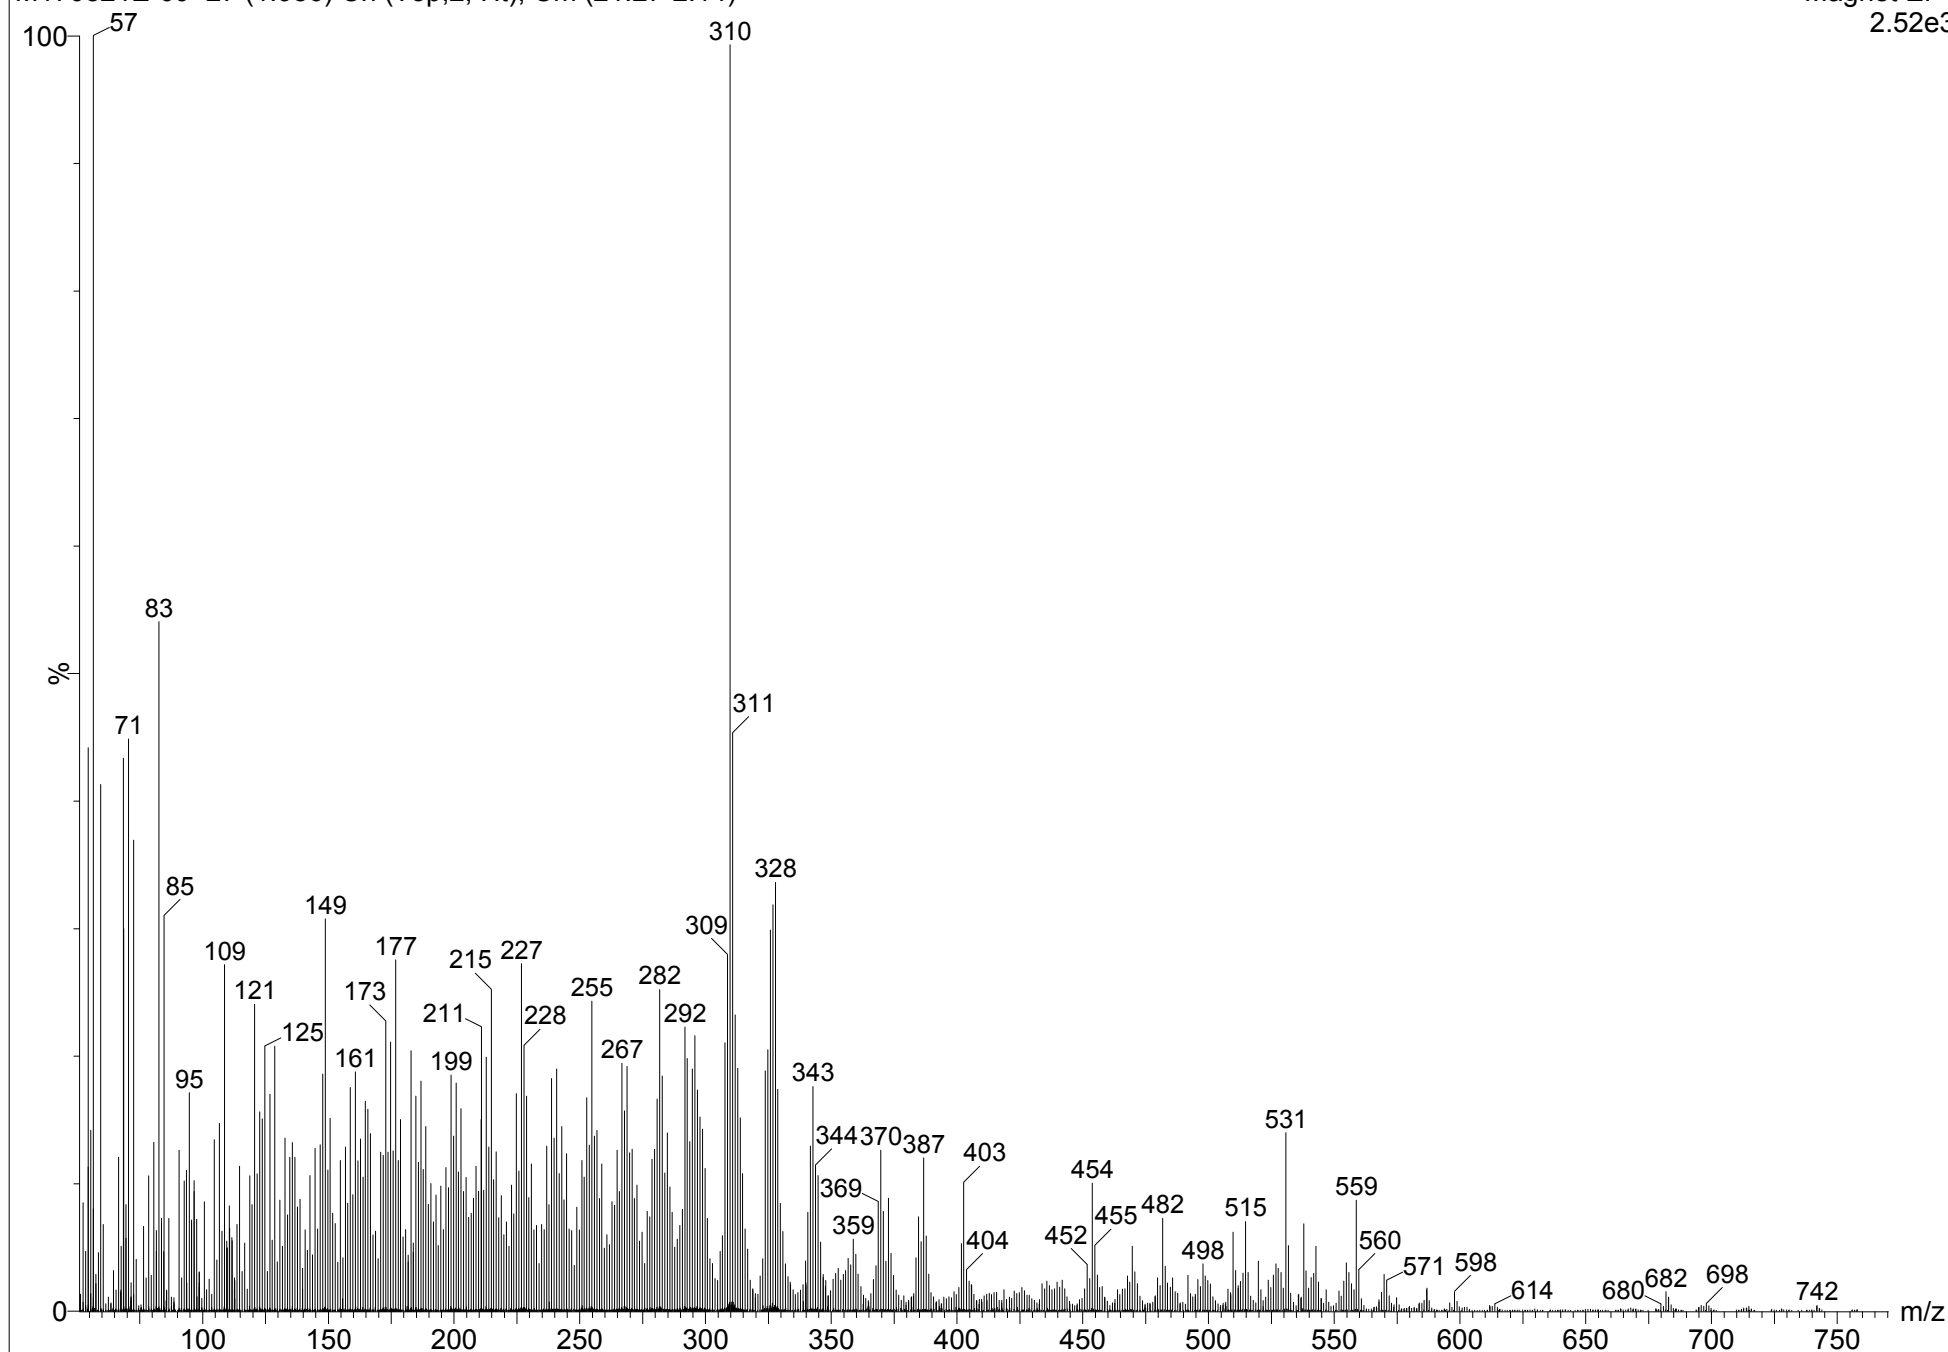

Supplement: s1 [file s1]
